# Supplementary material for: A novel AQDS–rGO composite to enhance the bioreduction of As(v)/Fe(iii) from the flooded arsenic-rich soil
Source: Royal Society of Chemistry journal article supplement (doi:10.1039/c7ra05393b), 2017-01-01
Supplement: c7ra05393b1.pdf [file c7ra05393b1.pdf]

1

## Supplemental material

2 **A novel AQDS-rGO composite to enhance the bioreduction of**

3 **As(V)/Fe(III) from the flooded arsenic-rich soil**

4 Zheng Chen<sup>a,b,c</sup>, Jinfeng Zhang<sup>a</sup>, Kezeng Han<sup>a</sup>, Chaoying Yang<sup>a</sup>, Xiuli Jiang<sup>a</sup>, Dun

5 Fu<sup>a</sup>, Qingbiao Li<sup>a</sup>, Yuanpeng Wang<sup>a,\*</sup>

6 <sup>a</sup>Department of Chemical and Biochemical Engineering, College of Chemistry and

7 Chemical Engineering, Xiamen University, Xiamen, P. R. China

8 <sup>b</sup>Key Laboratory of Estuarine Ecological Security and Environmental Health, Tan

9 Kah Kee College, Xiamen University, Zhangzhou, P. R. China

10 <sup>c</sup>Fujian Provincial Key Laboratory of Resource and Environment Monitoring &

11 Sustainable Management and Utilization, Sanming, P. R. China

12 **Figure: S1-S4**

13 **Table: S1**

---

\* Corresponding author:

Department of Chemical and Biochemical Engineering, College of Chemistry and Chemical  
Engineering, Xiamen University, No. 422, Southern Siming Road, Xiamen 361005, China.

E-mail address: [wyp@xmu.edu.cn](mailto:wyp@xmu.edu.cn)(Y. Wang)

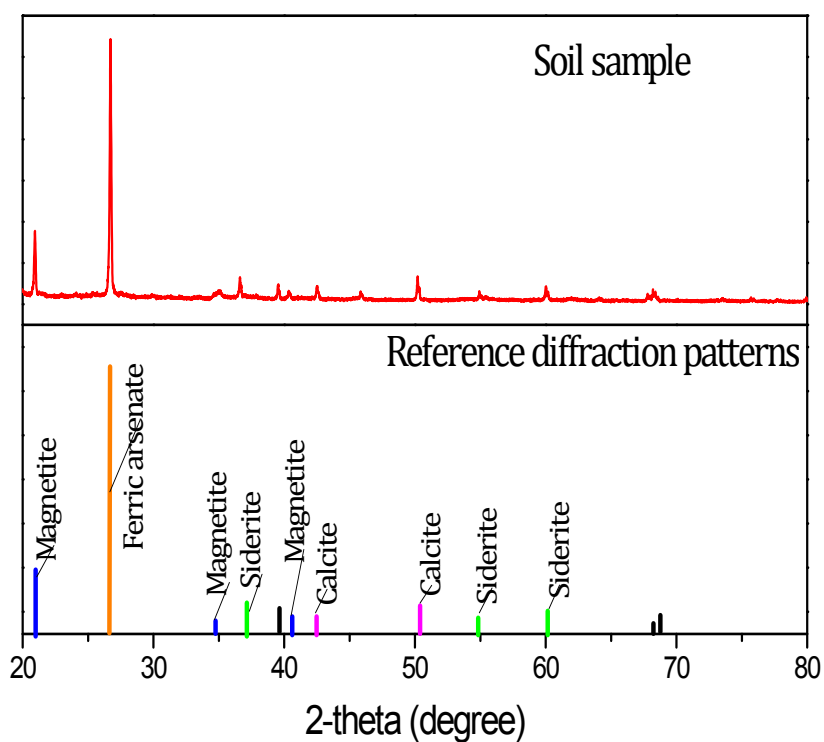

15

16 **Fig. S1.** X-ray diffraction (XRD) of minerals in soil samples.

17

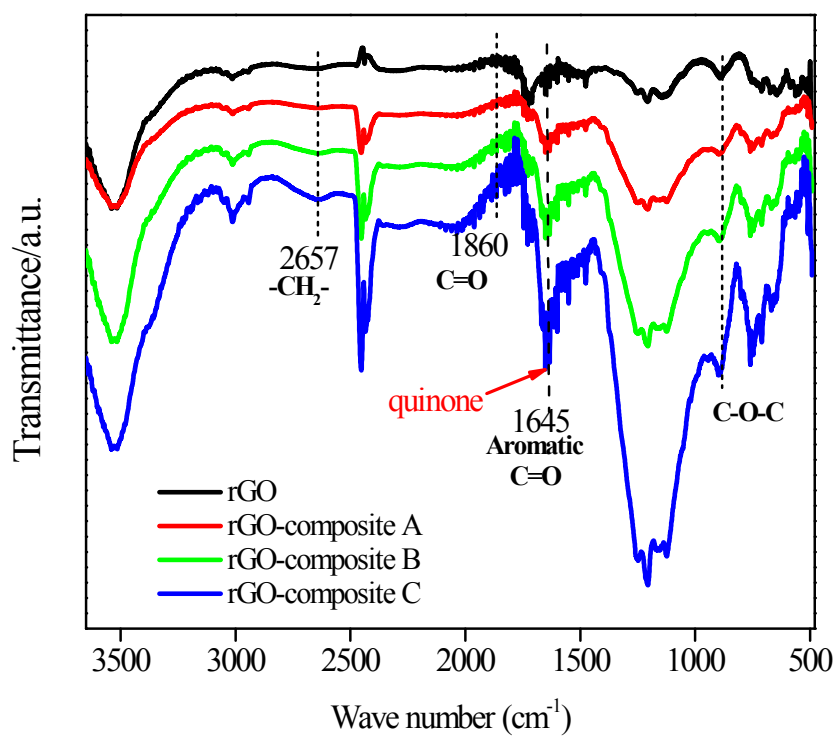

18

19 **Fig. S2.** FTIR spectra characterization of rGO-composite.

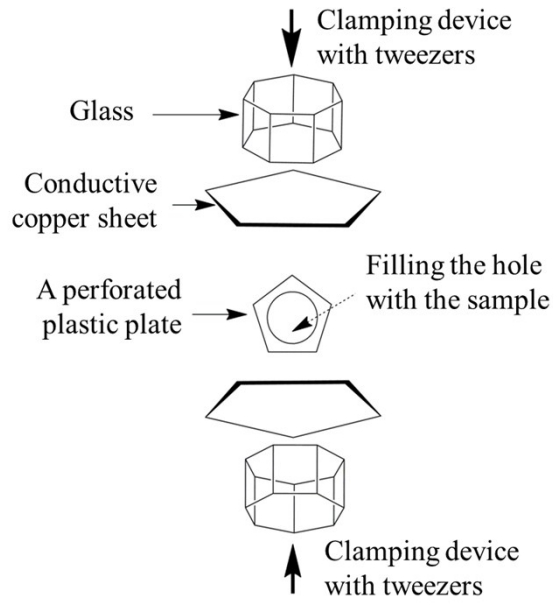

20

21 **Fig. S3.** The impedance-measuring-device system used for the measurement of  
 22 electrical conductivity.

23

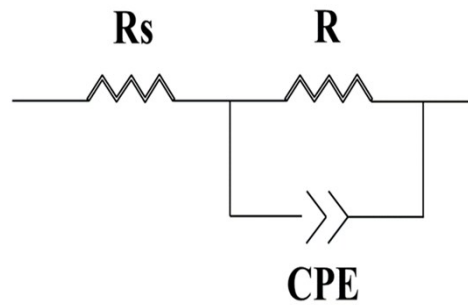

**Rs:** contact resistance

**R:** circuit resistance

**CPE:** other parameters component in circuit

24

25 **Fig. S4.** The schematic of analog circuitry (c) used for the measurement of electrical  
 26 conductivity.

28 It's worth noting that the graphene conductivity has been strongly highlighted in  
29 many electronic applications territories.<sup>1</sup> Thus, an assumption based on the graphene  
30 electrical conductivity (EC) might serve a promotion to the electron transfer under  
31 graphene amendments. In this study, the measurement for the electrical conductivity  
32 of slurry under corresponding amendments was conducted using a specific impedance  
33 measuring device system (Fig. S3) designed by Dongping Zhan *et al* from  
34 Engineering Research Center of Electrochemical Technology, Xiamen University,  
35 China. Specifically, a certain quality of slurry sample was triplicately eluted using  
36 phosphate buffer (0.1 M, pH=7.2) to remove the surface attached residue. Then,  
37 eluted slurry was carried out for the step-by-step dehydration by gradient levels (50%,  
38 70%, 80%, 90% and 100%) of ethanol with 15 minutes of soakage in each step.  
39 Thereafter, the impedance measurement was employed according to the artificial  
40 circuit (Fig. S4) by setting the parameters of DC Voltage (0 V) and current frequency  
41 ( $10^5$ - $10^{-1}$  Hz). The results could be calculated after incorporating the recorded values  
42 from the Software ZView2 into the Equation S1, where  $L$  denotes the thickness of  
43 dried-slurry,  $R$  and  $S$  are the resistance and the base circle area (with diameter of 1.2  
44 mm) of filling cavity, respectively. The unit of the electrical conductivity result value  
45 is  $\mu\text{s}/\text{cm}$ .

$$46 \quad k = \frac{L}{R \times S} \quad (\text{S1})$$

47 **Table S1.** The biotic/abiotic amendments conducted in this study.

| No.  | Amendments                                                                  |
|------|-----------------------------------------------------------------------------|
| I    | Soil (15 g) + Substrate (NaAc: 20 mM, 45 mL)                                |
| II   | Soil (15 g) + Substrate (NaAc: 50 mM, AQDS: 0.05 mM, 45 mL)                 |
| III  | Soil (15 g) + Substrate (NaAc: 50 mM, AQDS: 0.10 mM, 45 mL)                 |
| IV   | Soil (15 g) + Substrate (NaAc: 50 mM, AQDS: 1.00 mM, 45 mL)                 |
| V    | Soil (15 g) + rGO (40 mg/L) + Substrate (NaAc: 20 mM, 45 mL)                |
| VI   | Soil (15 g) + rGO (40 mg/L) + Substrate (NaAc: 50 mM, AQDS: 0.05 mM, 45 mL) |
| VII  | Soil (15 g) + rGO (40 mg/L) + Substrate (NaAc: 50 mM, AQDS: 0.10 mM, 45 mL) |
| VIII | Soil (15 g) + rGO (40 mg/L) + Substrate (NaAc: 50 mM, AQDS: 1.00 mM, 45 mL) |
| IX   | Soil (15 g) + rGO-composite A (40 mg/L) + Substrate (NaAc: 20 mM, 45 mL)    |
| X    | Soil (15 g) + rGO-composite B (40 mg/L) + Substrate (NaAc: 20 mM, 45 mL)    |
| XI   | Soil (15 g) + rGO-composite C (40 mg/L) + Substrate (NaAc: 20 mM, 45 mL)    |

48

## 49 **References**

- 50 1. C. L. Su and K. P. Loh, *Accounts Chem Res*, 2013, **46**, 2275-2285.
